# Supplementary material for: Dynamically activating Ni-based catalysts with self-anchored mononuclear Fe for efficient water oxidation
Source: Royal Society of Chemistry journal article supplement (doi:10.1039/d3ta00866e), 2023-01-01
Supplement: d3ta00866e1.pdf [file d3ta00866e1.pdf]

## Supporting Information

### **Dynamically Activating Ni-Based Catalysts by Self-Anchored Mononuclear Fe for Efficient Water Oxidation**

Zhiyuan Zhang<sup>1,6</sup>, Yuting Luo<sup>1,4,6</sup>, Kun Wang<sup>1,6</sup>, Qiangmin Yu<sup>1</sup>, Xin Kang<sup>1</sup>, Yingqi Liu<sup>1</sup>,  
Ke Xie<sup>4</sup>, Zhengxing Lv<sup>2</sup>, Zhibo Liu<sup>3</sup>, Fengning Yang<sup>1</sup>, Heming Liu<sup>1</sup>, Ke Liu<sup>2</sup>, Jiong Li<sup>2</sup>,  
Guangmin Zhou<sup>1</sup>, Wencai Ren<sup>3</sup>, Hui-Ming Cheng<sup>1,3,5</sup>, Jia Li<sup>\*1</sup>, Shuo Zhang<sup>\*2</sup> & Bilu  
Liu<sup>\*1</sup>

<sup>1</sup>Shenzhen Geim Graphene Center, Tsinghua-Berkeley Shenzhen Institute & Institute of  
Materials Research, Tsinghua Shenzhen International Graduate School, Tsinghua  
University, Shenzhen 518055, P. R. China.

<sup>2</sup>Shanghai Synchrotron Radiation Facility, Shanghai Advanced Research Institute,  
Chinese Academy of Sciences, Shanghai 201210, China.

<sup>3</sup>Shenyang National Laboratory for Materials Sciences, Institute of Metal Research,  
Chinese Academy of Sciences, Shenyang, Liaoning 110016, P. R. China

<sup>4</sup>Department of Electrical and Computer Engineering, University of Toronto, 35 St  
George Street, Toronto, Ontario M5S 1A4, Canada.

<sup>5</sup>Shenzhen Institute of Advanced Technology, Chinese Academy of Sciences, Shenzhen  
518055, China.

<sup>6</sup>These three authors contributed equally.

\* E-mail: bilu.liu@sz.tsinghua.edu.cn; zhangshuo@sinap.ac.cn; li.jia@sz.tsinghua.edu.cn

1 This file contains description of experimental and calculation methods, 15 Supplementary  
2 Figures, and 8 Tables.

3

#### 4 **Methods**

5 **Chemicals.** Nickel (II) nitrate hexahydrate (with a formula of  $\text{Ni}(\text{NO}_3)_2 \cdot 6\text{H}_2\text{O}$ , AR,  
6 Guangdong Guanghua Sci-Tech Co., Ltd, China), ammonium molybdate tetrahydrate  
7 (with a formula of  $(\text{NH}_4)_6\text{Mo}_7\text{O}_{24} \cdot 4\text{H}_2\text{O}$ , AR, Shanghai Aladdin Biochemical Technology  
8 Co., Ltd, China), and potassium hydroxide (KOH, AR, Shanghai Macklin Biochemical  
9 Co., Ltd, China ) were used without further purification. Ni foams (0.5 mm thick, purity  
10 >99.99%, Linyi Gelon LIB Co., Ltd, China) were used as received. Ultrapure Direct-Q  
11 water ( $18.2 \text{ M}\Omega \text{ cm}^{-1}$ ) was used to prepare all the aqueous solutions and for washing  
12 samples.

13

14 **Synthesis of Fe-doped  $\text{NiMoO}_4$ .** Fe-doped  $\text{NiMoO}_4$  on Ni foam was synthesized by a  
15 hydrothermal method. First, a piece of Ni foam ( $40 \text{ mm} \times 10 \text{ mm} \times 0.5 \text{ mm}$ ) was sonicated  
16 in a 1 M HCl aqueous solution for 40 min to remove the surface oxide layer and then  
17 washed with deionized water to remove residual HCl. Second,  $(\text{NH}_4)_6\text{Mo}_7\text{O}_{24}$  (0.3 mol),  
18  $\text{Ni}(\text{NO}_3)_2 \cdot 6\text{H}_2\text{O}$  (1.2 mmol), and  $\text{Fe}(\text{NO}_3)_3 \cdot 9\text{H}_2\text{O}$  (0.075 mmol) were added to deionized  
19 water (30 mL) and stirred to form a uniform solution. Finally, the mixed solution and the  
20 cleaned Ni foam were transferred into a 100 mL Teflon-lined stainless-steel autoclave for  
21 the hydrothermal reaction at  $120^\circ\text{C}$  for 12 h. The prepared Fe-doped  $\text{NiMoO}_4$  on Ni foam

1 was thoroughly washed with deionized water and then dried in a vacuum at 60 °C for 12  
2 h.

3

4 **Synthesis of Fe<sub>1</sub>-NiMo.** Fe<sub>1</sub>-NiMo was synthesized by H<sub>2</sub> reduction of Fe-doped NiMoO<sub>4</sub>.

5 The hydrothermal prepared Fe-NiMoO<sub>4</sub> was put into a quartz tube furnace. The tube was

6 firstly purged with Ar (400 sccm) for 30 min and then heated up to 500 °C at a rate of 8 °C

7 min<sup>-1</sup>. The mixture of Ar (190 sccm.) and H<sub>2</sub> (10 sccm) was then introduced for 30 min to

8 prepare the Fe<sub>1</sub>-NiMo catalyst. After that, H<sub>2</sub> was turned off and the furnace was cooled to

9 room temperature under Ar (190 sccm). For the NiMo control samples, the synthetic

10 procedures were the same as that of the Fe<sub>1</sub>-NiMo catalyst, but the Fe precursors were not

11 added into the solution in the hydrothermal growth step.

12

13

14 **Materials characterization.** The morphology of the samples was examined by SEM (5

15 kV, Hitachi SU8010, Japan). HRTEM analyses were carried out at an electron acceleration

16 voltage of 300 kV (FEI Titan Cubed Themis G2 300, USA). Structural and chemical

17 analyses of the samples were performed by powder XRD (Cu K $\alpha$  radiation,  $\lambda$ =0.15418 nm,

18 Bruker D8 Advance, Germany). High-resolution XPS was performed with Al K $\alpha$  X-rays

19 (PHI5000VersaProbeII, Japan, and ESCALAB 250Xi, USA). The XPS profile was

20 performed by Ar etching with an accelerating voltage of 4 kV and an angle of 45°. The

21 element content was tested by ICP-OER (SPECTRO Arcos II MV, Germany). The

1 reconstructed sample for postmortem characterization (SEM, HRTEM, ICP-OES, and  
2 XPS) experienced an OER process at a current density of  $\sim 100 \text{ mA cm}^{-2}$  for 100h. The  
3 sample named OC was immersed in oxygen saturated 1M KOH solution for 30 min. The  
4 reconstructed samples for characterization were taken out from the electrolyte, then washed  
5 with water, and finally dried in a vacuum drier. The transfer procedure was finished within  
6 one minute.

7

8 **In-situ XAS measurements.** The XAS spectra at the Fe and Ni K-edges were recorded at  
9 the BL11B beamline of the Shanghai Synchrotron Radiation Facility (SSRF). The beam  
10 current of the storage ring was 220 mA in a top-up mode. The incident photons were  
11 monochromatized by a Si (111) double-crystal monochromator, with an energy resolution  
12  $\Delta E/E \sim 1.4 \times 10^{-4}$ . The spot size at the sample was  $\sim 200 \text{ }\mu\text{m} \times 250 \text{ }\mu\text{m}$  (H  $\times$  V). The XAS  
13 spectra of the samples at Fe and Ni K-edges were calibrated by the Fe and Ni reference  
14 foils, respectively. The Fe<sub>1</sub>-NiMoFe catalyst powders were exfoliated from Ni foam  
15 supports and then loaded on carbon papers. In-situ XAFS measurements were performed  
16 with the carbon paper as a working electrode using a homemade in-situ electrochemical  
17 cell setup. A graphite rod was used as a counter electrode and a double-salt-bridge saturated  
18 calomel electrode (SCE) as a reference electrode in 1.0 M KOH solution. Electrochemical  
19 measurements were conducted on CHI 660E electrochemical workstation. XAFS  
20 measurement was carried out after potential was for 10 min. In-situ XAFS spectra at the  
21 Ni and Fe K-edges were collected in fluorescence mode, with a Lytle ionization chamber

1 filled with Ar. Ni and Fe K edges of references are collected in transition mode.

2 **XAFS data analysis.** The data of XAFS were processed with ATHENA software

3 implemented in the IFEFFIT software packages.<sup>1</sup> The raw data of XAFS were background

4 subtracted from the overall absorption and then normalized regarding the edge-jump step.

5 Next, the  $k^3$ -weighted  $\chi(k)$  data of Fe K-edge and Ni K-edge were Fourier transformed to

6 R space using a Hanning window ( $dk = 1.0 \text{ \AA}^{-1}$ ) in k-space, which separates the

7 contributions of different coordination shells to the EXAFS data. EXAFS of Fe K-edge

8 were Fourier transformed between 2.670 and 12.085  $\text{\AA}^{-1}$ . And EXAFS data Ni K-edge were

9 Fourier transformed between 2.556 and 12.335  $\text{\AA}^{-1}$ . The quantitative structure parameters

10 of Fe were obtained by least-squares fitting of EXAFS data with ATERMIS software in

11 the IFEFFIT software packages. The fitting was according to the EXAFS equation:

$$\chi(k) = \sum_i \frac{N_i S_0^2 F_i(k)}{k R_i^2} \sin(2kR_i + \varphi_i(k)) e^{\frac{-2R_i}{\lambda(k)} - 2\sigma_i^2 k^2}$$

12

13 where  $F_i(k)$ , the effective scattering amplitude,  $\lambda(k)$  the mean free path, and  $\varphi_i(k)$ , the

14 effective scattering phase shift were theoretically calculated by the ab-initio code FEFF 6<sup>2</sup>.

15 The fitting was conducted in R space with the single scattering path of the first and the

16 second coordination shells. The multiple scattering paths are not considered in our fitting

17 since the noise of the in-situ EXAFS data is relatively high. The fitting in R space is more

18 reasonable than in k space in this work because we cannot use all the path in the EXAFS

19 fitting.

20 The wavelet transformations of EXAFS were performed in the k range between 2.65

1 and 12.10 Å<sup>-1</sup> with a k step of 0.05 Å<sup>-1</sup> and the R range between 0 and 6 Å with the  
2 hamaFortran program by using the Morlet wavelets<sup>3</sup>:

3 
$$\varphi(k) = \frac{1}{\sqrt{2\pi}\sigma} e^{-\frac{k^2}{2\sigma^2}} (e^{i\omega k} - e^{-\frac{k^2}{2}})$$

4 Where  $\omega$  is the frequency and  $\sigma$  is the half width. We chose  $\omega=6$  and  $\sigma=0.83$  to get a high  
5 resolution in the region of the second coordination shell of pristine Fe<sub>1</sub>-NiMo and Fe<sub>1</sub>-  
6 NiMo under OC conditions. The wavelet transformation of EXAFS of Fe<sub>1</sub>-NiMo at 1.47  
7 V vs RHE is performed with  $\omega=5$  and  $\sigma=1.2$ .

8

9 **In-situ XRD measurements.** The XRD measurements were conducted with a synchrotron  
10 radiation X-ray beam (16 keV) at the BL17U beamline of the Shanghai Synchrotron  
11 Radiation Facility (SSRF). The working electrode for in-situ XRD measurement was  
12 prepared by the following two step. In the first step, we exfoliated catalyst powders and  
13 collected them. We put a piece of Ni foam loading Fe<sub>1</sub>-NiMo in a polypropylene tube and  
14 shook the tube violently, then some powders falling off from the Ni foam was collected. A  
15 magnet was then used to separate the fragments of Ni foam from Fe<sub>1</sub>-NiMo in the  
16 powders. The exfoliation and collection processes were done in a glove box filled with Ar  
17 gases. In the second step, we prepare the working electrode for in-situ XRD. 10 mg of Fe<sub>1</sub>-  
18 NiMo powders were dispersed in 1 mL isopropanol under sonication and formed a uniform  
19 ink. Then, 400 µL ink was gradually dropped on carbon paper (1.5 cm × 1.5 cm) for the  
20 in-situ XRD measurement. In-situ XRD measurements were performed with the carbon

1 paper as a working electrode using a homemade in-situ electrochemical cell setup. A  
2 graphite rod was used as a counter electrode and a mercuric oxide electrode as a reference  
3 electrode in 1 M KOH solution. The electrode potential was set as 0.7 V vs Hg/HgO  
4 reference. The reflection patterns were collected by a plane detector (Dectris Eiger 16M,  
5 E-32-0111) with an exposure time of 1 s and an exposure period of 1 s.

6

7 **In-situ Raman measurements.** Raman spectra were collected using a 633 nm laser  
8 excitation with a beam size of  $\sim 1\ \mu\text{m}$  grating (Horiba LabRAB HR800, Japan). Catalyst  
9 powders were exfoliated from Ni foam and then were loaded on a Ti foil whose surface is  
10 coated gold by E-beam evaporation. In-situ Raman measurements were performed with the  
11 gold-coated Ti foil that was loaded with catalysts as a working electrode using a homemade  
12 in-situ electrochemical cell setup. A Pt wire was used as a counter electrode and a double  
13 salt bridge SCE as a reference electrode in 1 M KOH solution. The scattered light was  
14 collected by a 50 X objective lens and then directed to a charge-coupled device (CCD)  
15 detector. Before in-situ experiments, the monochromator was calibrated by  $520.7\ \text{cm}^{-1}$ , the  
16 peak of silicon.

17

18 **Electrochemical measurements.** The mass loading of the  $\text{Fe}_1\text{-NiMo}$  and  $\text{NiMo}$  catalyst  
19 were measured to be  $3.7\ \text{mg cm}^{-2}$  and  $8.4\ \text{mg cm}^{-2}$  respectively.  $\text{IrO}_2$  with a mass loading  
20 of  $\sim 4\ \text{mg cm}^{-2}$  was drop-casted on Ni foam as a comparison sample. The Ni foam loaded  
21  $\text{IrO}_2$  was annealed in Ar at  $500\ ^\circ\text{C}$  before the electrochemical test. A standard three-

1 electrode electrolyzer with oxygen-saturated KOH (1.0 M) was used in all tests, a double-  
2 salt-bridge SCE as reference electrodes and a graphite rod as counter electrodes. The scan  
3 rate was 1 mV s<sup>-1</sup> for cyclic voltammetry tests. The cyclic voltammetry test was tested  
4 repeatedly before stable and the final data were reported. To eliminate the signal from the  
5 oxidation of Fe and Ni, the negatively scanned polarization curves were used. For fair  
6 comparisons, an 85% *iR* correction was taken. The distance between the reference  
7 electrode and the working electrode was fixed by a capillary filling with saturated KCl  
8 solutions. And the SCE is immersed in this capillary, constituting a double salt bridge  
9 setup. The double-salt-bridge SCE was used as reference electrode in all the tests except  
10 in-situ XRD measurements. Faradaic efficiencies were defined as the ratio of O<sub>2</sub> volume  
11 collected in an experiment to the volume in theory, and O<sub>2</sub> was collected by the water  
12 drainage method. Stability tests were performed by the chronoamperometry measurements  
13 method.

14 To get specific activity, the reaction current was normalized by the electrochemical

15 surface area (ECSA) of catalysts. ECSA was calculated by  $ECSA = \frac{C_{dl}}{C_s}$ , where  $C_{dl}$  is the  
16 electrochemical double-layer capacitance of working electrodes and  $C_s$  is specific  
17 capacitance of the electrode materials, which was recommended as 0.04 mF cm<sup>-2</sup> in  
18 alkaline<sup>4, 5</sup>. Considering the reconstruction of catalysts, the electrochemical double-layer  
19 capacitance was tested after the OER process. The specific activity normalized by the  
20 redox-active sites was also provided, where the reducing reactions is assumed as a single

1 electron reaction and all the metal atoms that participated in the reducing reaction are  
2 assumed the active sites. The number of redox-active ( $m_{\text{redox}}$ ) sites was calculated

3 according to the area of reducing peak according to  $m_{\text{redox}} = \frac{\int \frac{j(E)}{v} A dE}{nF}$ , where  $j$  is the  
4 current density,  $E$  is the electrode potential,  $v$  is the scan rate,  $A$  the geometric surface area  
5 of working electrodes,  $F$  is the Faraday constant (96485 C mol<sup>-1</sup>), and  $n$  is the number of  
6 electrons involved in the reaction.

7 TOF was calculated by  $\text{TOF} = \frac{j \times A}{4 \times F \times m}$ . In this study, we assumed all metal atoms,  
8 including Ni, Fe, Mo, and Ir, in catalysts are counted as active sites to avoid overwhelming  
9 of activity of catalysts, and the amounts of metal elements of Fe<sub>1</sub>-NiMo and NiMo were  
10 obtained by ICP-OES (Table S8). TOF based on  $m_{\text{redox}}$  was also provided.

11

12 **Membrane electrode assembly measurement.** The membrane electrode measurement  
13 was performed in a homemade step (Figure S14) under ambient temperature and pressure  
14 with Fe<sub>1</sub>-NiMo catalysts grown on Ni foam as the anode and commercial Pt/C catalysts as  
15 the cathode. A Pipnioer anion exchange membrane was used to separate the anode and the  
16 cathode chambers. The flow rate of anolyte is about 40 mL min<sup>-1</sup>.

17

18 **DFT calculations.**

19 All DFT calculations were performed by the Vienna Ab initio Simulation Package

1 (VASP).<sup>6-8</sup> The generalized gradient approximation (GGA) of the Perdew-Burke-  
 2 Ernzerhof (PBE) functional<sup>9</sup> and the projector augmented-wave (PAW) potential<sup>10</sup> were  
 3 employed. Grimme method<sup>11, 12</sup> was used to consider the van der Waals' interaction for  
 4 layer materials. The GGA + U calculations were performed using the model proposed by  
 5 Dudarev et al.,<sup>13</sup> with the effective U values of 6.4, and 4.0 eV for Ni and Fe, respectively.  
 6 The layered oxyhydroxide monolayers were constructed by using a  $4 \times 4$  supercell. The  
 7 constructed supercell was isolated with a 15 Å vacuum space in the z-direction. For all  
 8 geometry optimizations, the cutoff energy was set to 520 eV. Monkhorst–Pack grids ( $3 \times$   
 9  $3 \times 1$ ) were used to sample the Brillouin zones of the supercell. The force and energy  
 10 convergence criterion were set to be  $2 \times 10^{-2}$  eV Å<sup>-1</sup> and  $10^{-5}$  eV, respectively. The (001)  
 11 facet of NiOOH is used in calculations because it is considered to be energetically  
 12 favorable to absorbing water molecules and forming the electrode-solution interface.<sup>14</sup>

13 In alkaline conditions, OER can occur via the following four elementary steps:

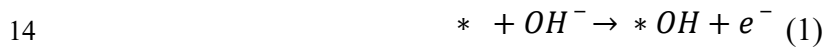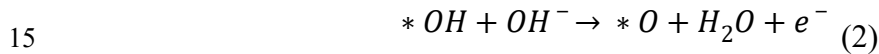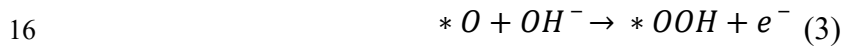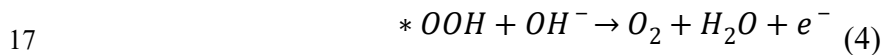

18 where \* denotes the active sites on the catalyst surface. The computational hydrogen  
 19 electrode (CHE)<sup>15, 16</sup> was used to calculate the free energies of intermediates. The free  
 20 energy of an adsorbed species is defined as

21 
$$\Delta G = \Delta E + \Delta ZPE - T\Delta S \quad (5)$$

- 1 where  $\Delta E$  is the electronic adsorption energy,  $\Delta ZPE$  is the zero-point energy difference
- 2 between adsorbed and gaseous species, and  $T\Delta S$  is the corresponding entropy difference
- 3 between these two states.

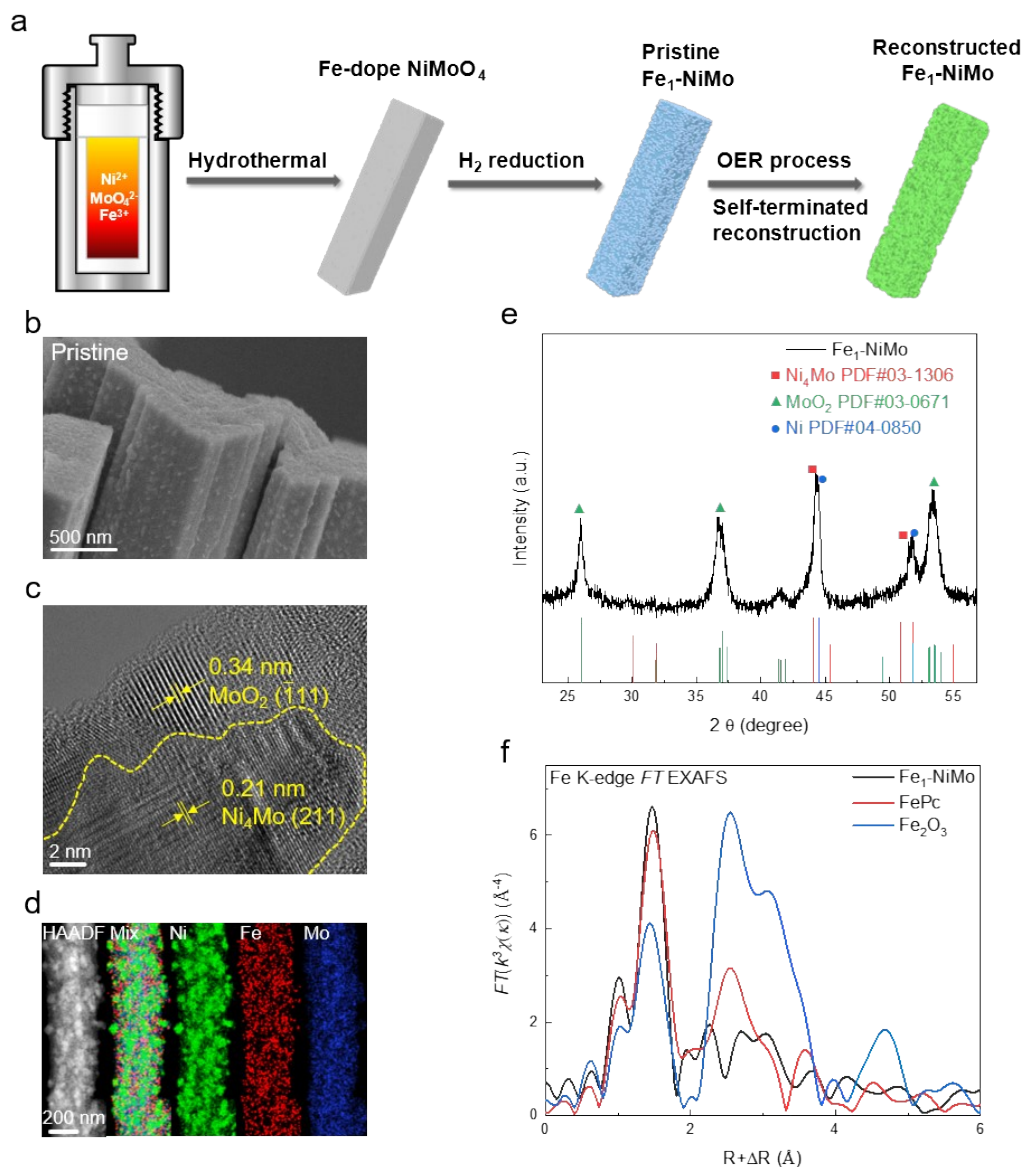

4  
5 **Figure S1.** Synthesis and characterization of the  $\text{Fe}_1\text{-NiMo}$  catalyst. (a) Synthesis  
6 flowchart and morphology evolution process of the  $\text{Fe}_1\text{-NiMo}$ . (b-e) SEM image (b),  
7 HRTEM image (c), and EDS mapping (d), and (e) PXRD pattern  $\text{Fe}_1\text{-NiMo}$  before

1 immersed into KOH electrolyte. The results indicate that the  $\text{Fe}_1\text{-NiMo}$  composed of  
 2  $\text{Ni}_4\text{Mo}$  nanoparticles and  $\text{MoO}_2$  prisms. For short, it is denoted as  $\text{Fe}_1\text{-NiMo}$  in this work.  
 3 f, FT-EXAFS at Fe K-edge of pristine  $\text{Fe}_1\text{-NiMo}$  and  $\text{Fe}_2\text{O}_3$  reference, demonstrate that Fe  
 4 in pristine  $\text{Fe}_1\text{-NiMo}$  exist as mononuclear metal center species.

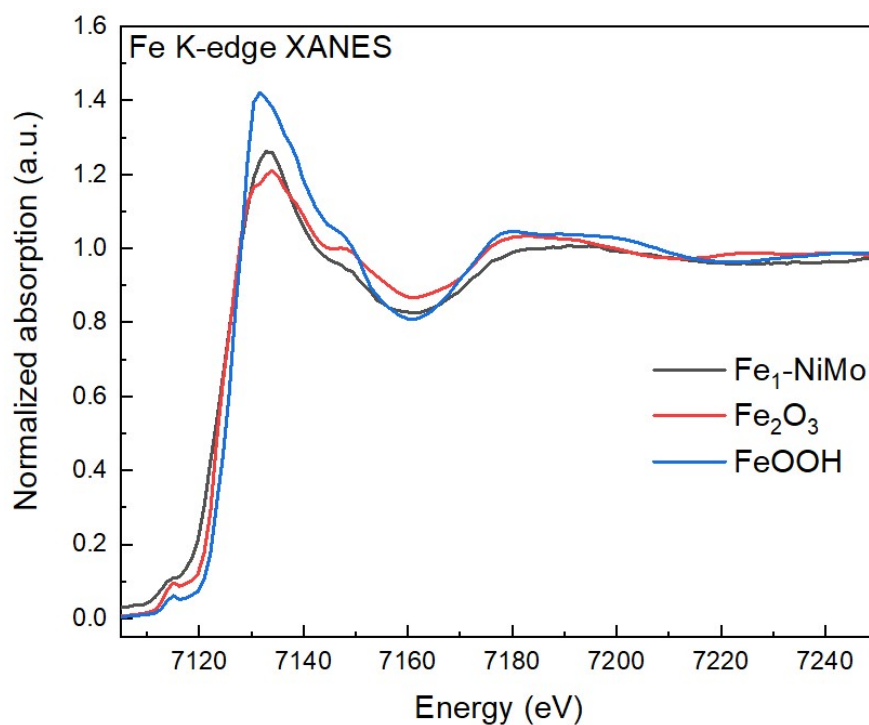

6  
 7 **Figure S2. Comparison of XANES at Fe K-edge of  $\text{Fe}_1\text{-NiMo}$  and contrasts.** These  
 8 results shows that Fe in  $\text{Fe}_1\text{-NiMo}$  is not locate in isolated phase.

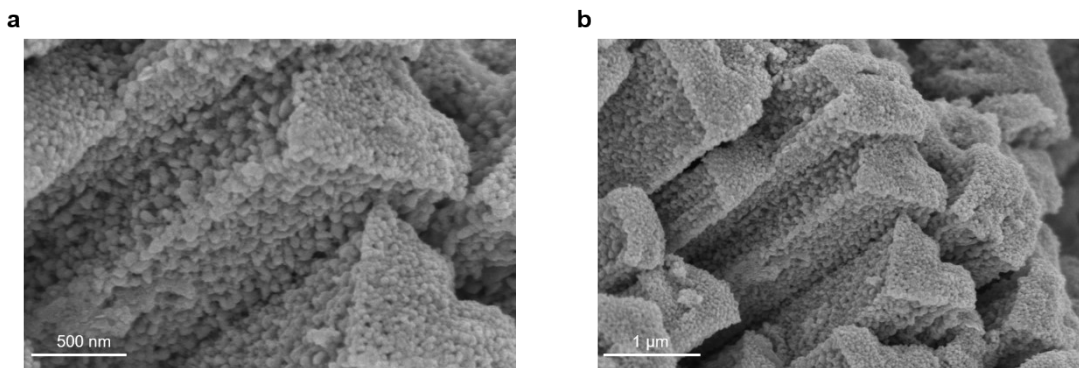

**Figure S3.** SEM images of the reconstructed Fe<sub>1</sub>-NiMo. These images indicate the reconstructed catalyst is assembled by nanoparticles.

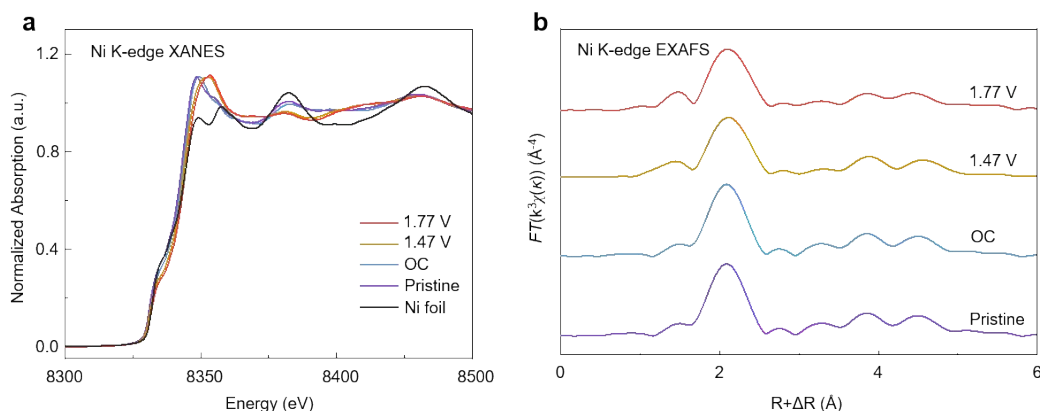

**Figure S4.** In-situ XAFS of the Fe<sub>1</sub>-NiMo at the Ni K-edge. XANES (a), FT-EXAFS (b), of Fe<sub>1</sub>-NiMo under ex-situ condition (pristine) and OER condition (from OC to 1.77 V vs RHE in 1 M KOH). These results state that Ni mainly maintains metallic state under OER condition.

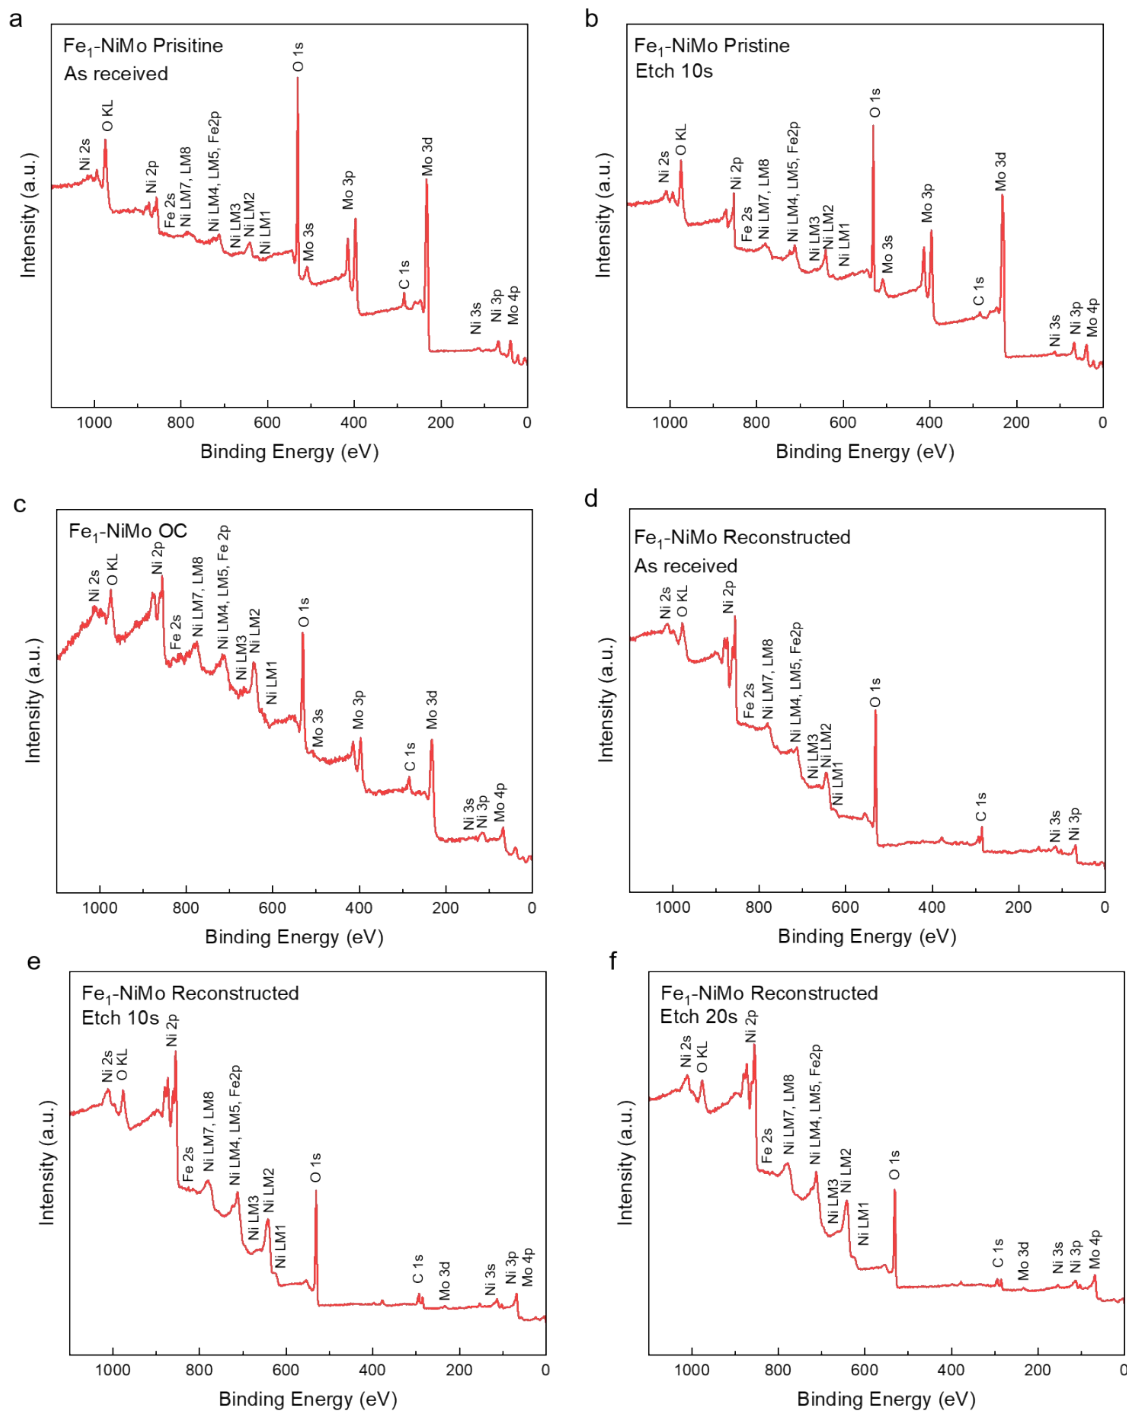

1

2 **Figure S5. XPS survey spectra of Fe<sub>1</sub>-NiMo.** The pristine Fe<sub>1</sub>-NiMo(a), and Fe<sub>1</sub>-NiMo  
3 etched with Ar ions for 10s (b), Fe<sub>1</sub>-NiMo after OC (c), Fe<sub>1</sub>-NiMo after reconstructed under  
4 OER (d), reconstructed Fe<sub>1</sub>-NiMo etched with Ar ions for 10 s (e), and reconstructed Fe<sub>1</sub>-  
5 NiMo etched with Ar ions for 20 s (f). The rate of etching is  $\sim 0.2 \text{ nm s}^{-1}$ . Fe 2p peaks are

1 overlapped with Ni LM4 and Ni LM5.

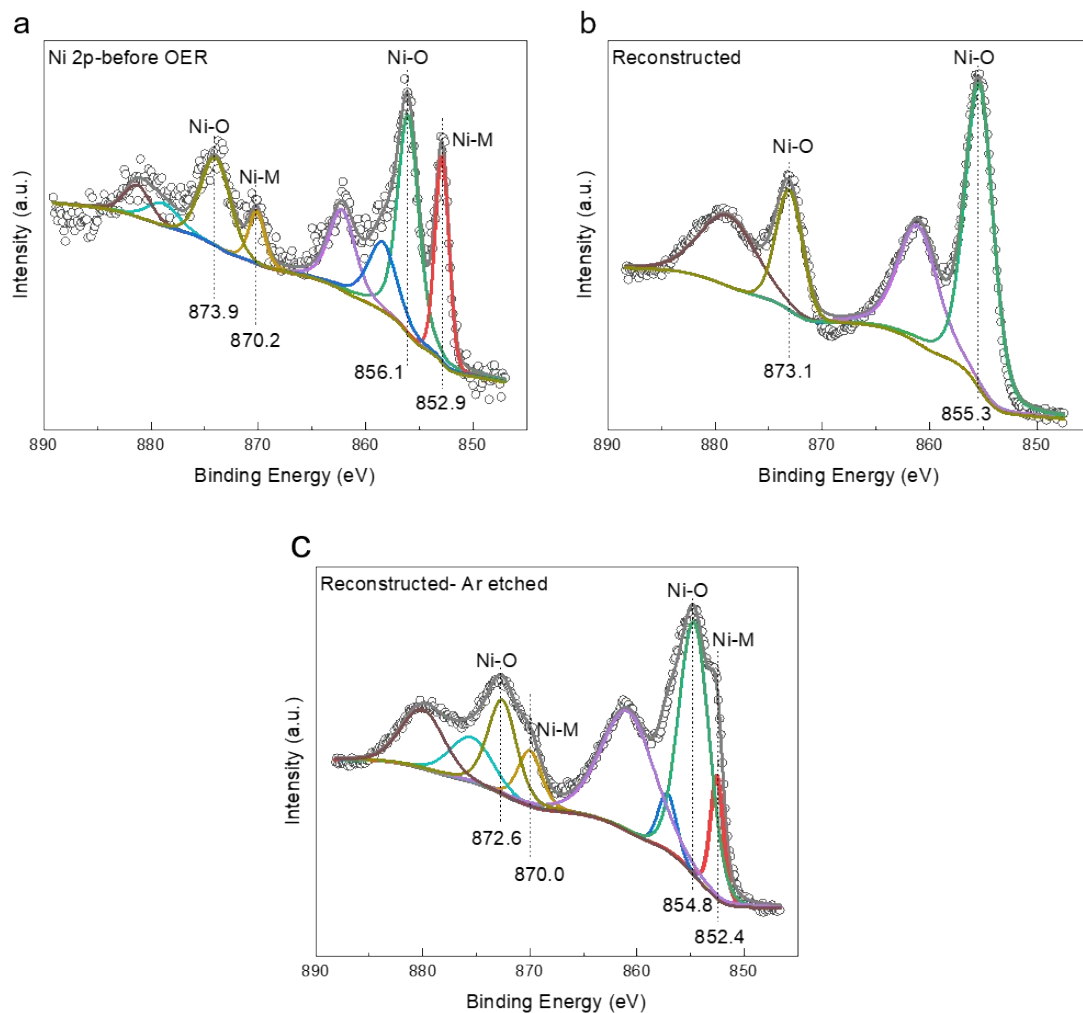

2

3 **Figure S6. Ni 2p XPS of pristine Fe<sub>1</sub>-NiMo (a), reconstructed Fe<sub>1</sub>-NiMo (b), and Ar**  
4 **ions etched reconstructed Fe<sub>1</sub>-NiMo (c).** The metallic Ni disappeared in reconstructed  
5 Fe<sub>1</sub>-NiMo but arise after etched by Ar ions. The peak positions of main lines are marked  
6 below the spectra.

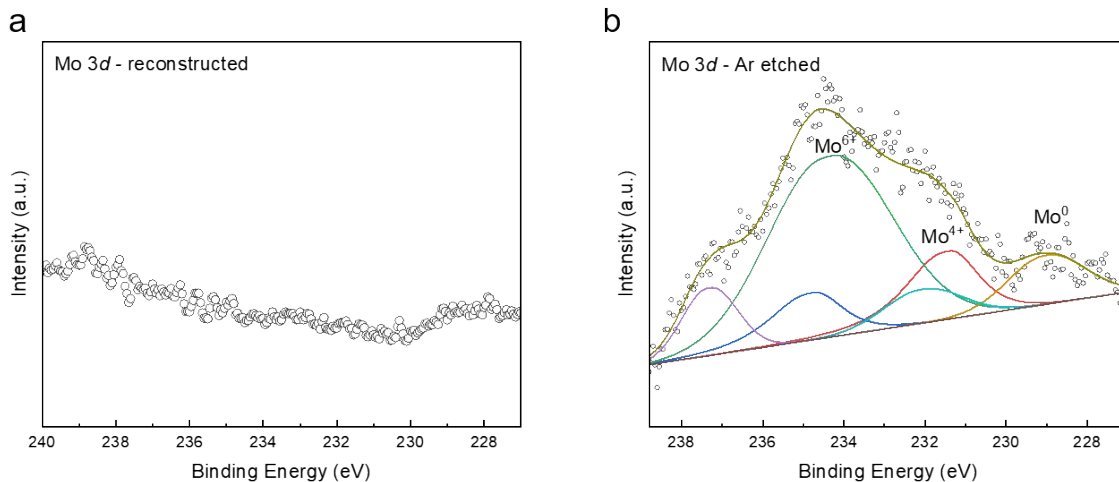

1  
2 **Figure S7. Mo 3d XPS of the reconstructed Fe<sub>1</sub>-NiMo (a), and reconstructed Fe<sub>1</sub>-**  
3 **NiMo etched by Ar ions for 10 s (b). The signal of Mo 3d is not detected in the**  
4 **reconstructed surface, but appears after Ar ions etching.**

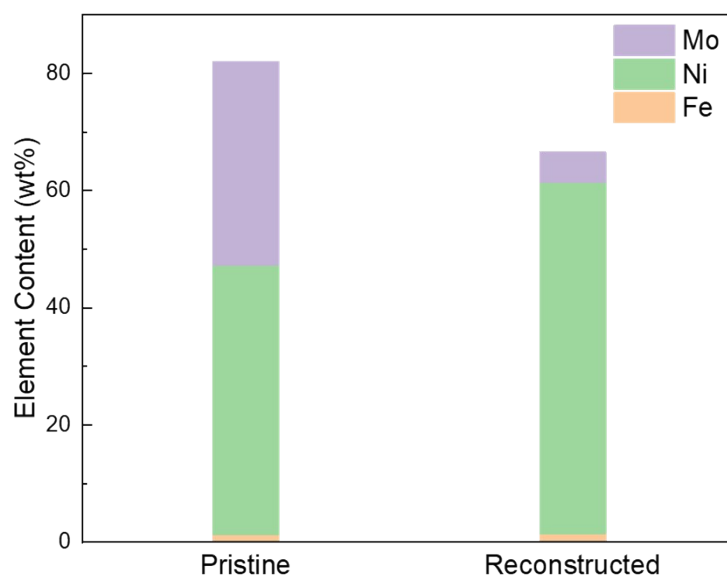

6  
7 **Figure S8. Elemental quantification results of the pristine and the reconstructed Fe<sub>1</sub>-**  
8 **NiMo catalyst from ICP-OES, showing the dissolution of Mo.**

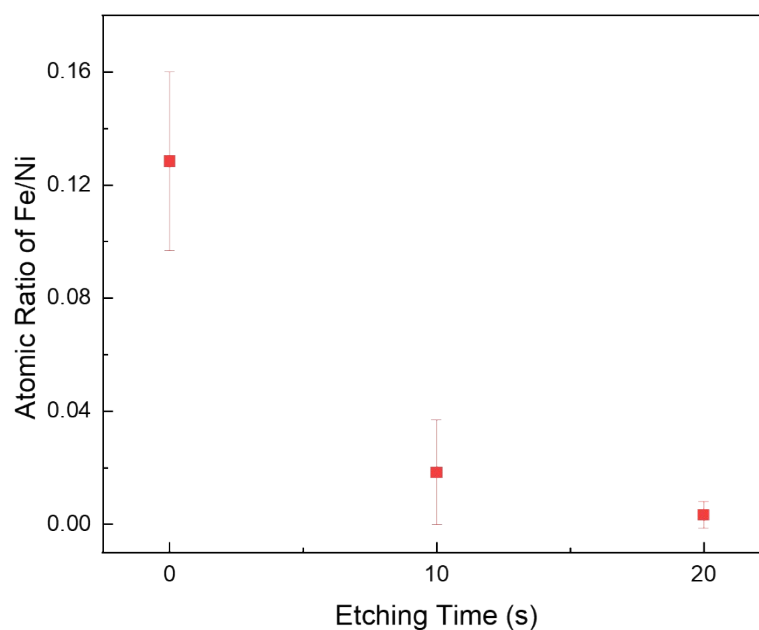

1  
2 **Figure S9. Semi-quantitative ratio of Fe to Ni from XPS depth-profile of the**  
3 **reconstructed Fe<sub>1</sub>-NiMo.** The rate of etching is  $\sim 0.2 \text{ nm s}^{-1}$ , indicating that Fe mainly  
4 located at the top  $\sim 4 \text{ nm}$  on the surface.

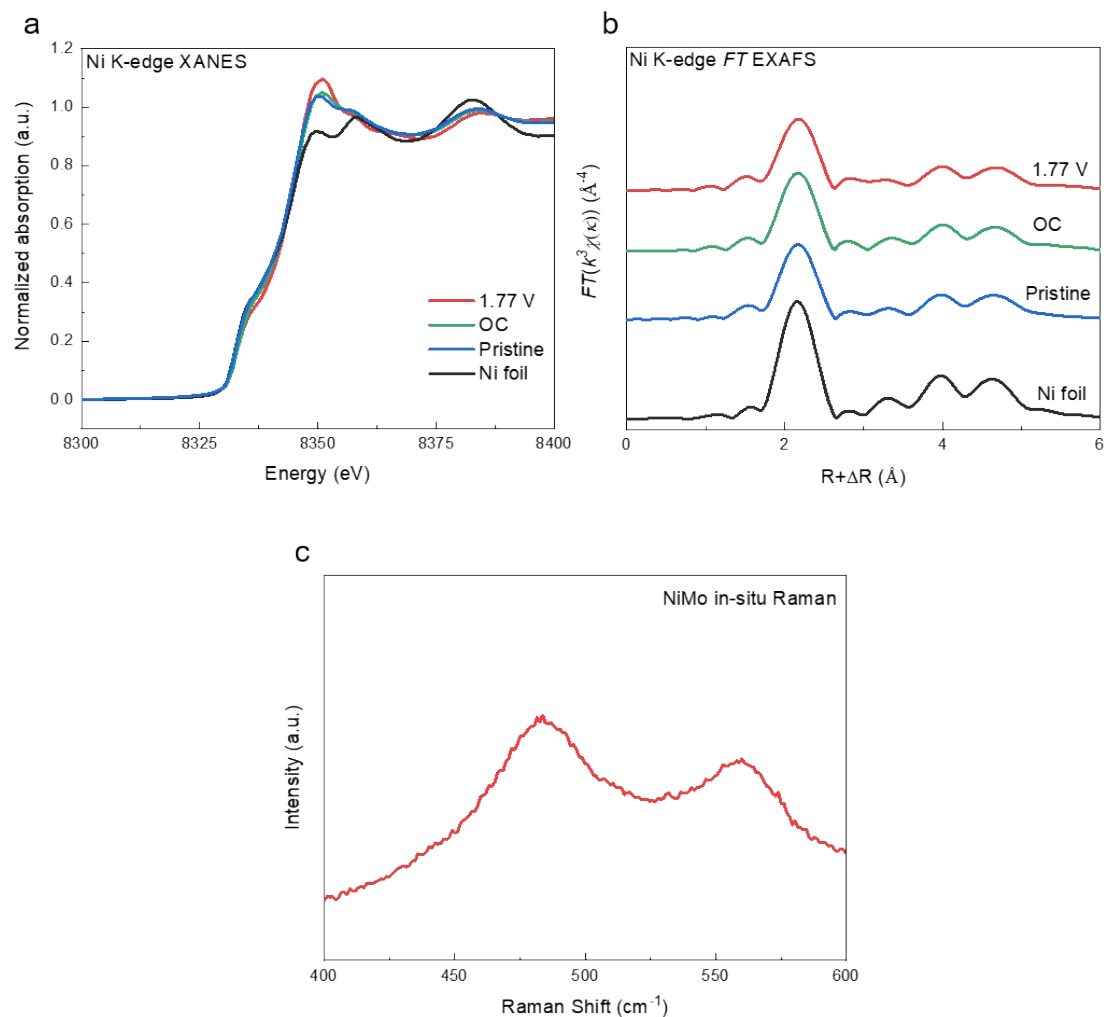

1  
 2 **Figure S10. In-situ characterization of NiMo. a, b, XANES (a) and FT-EXAFS (b) of**  
 3 **NiMo under different condition and Ni foil reference. c, In-situ Raman spectrum of NiMo**  
 4 **under 1.47 V vs RHE. These results indicate that NiMo is also composed of metallic core**  
 5 **and NiOOH shell under OER condition.**  
 6

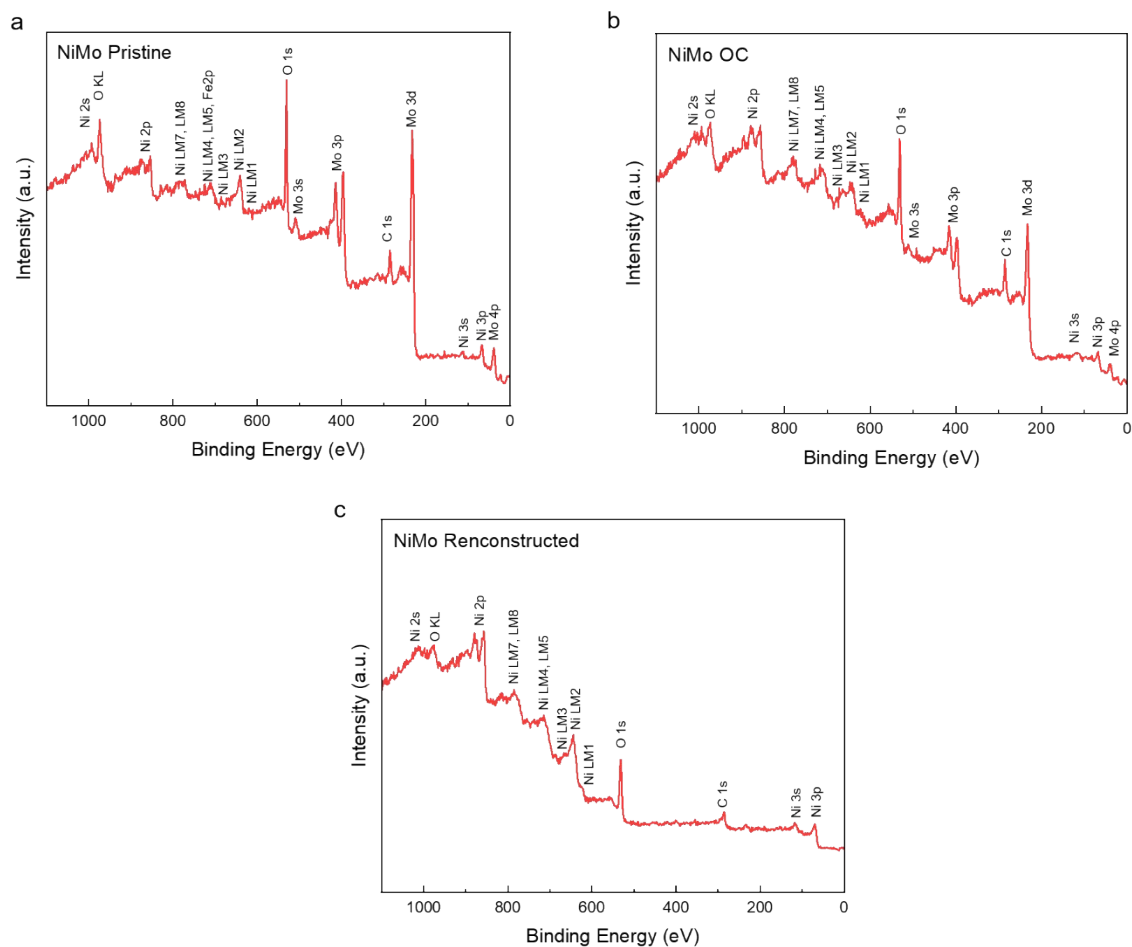

1  
2 **Figure S11. XPS survey spectra of pristine NiMo (a), NiMo after OC (b), NiMo after**  
3 **reconstructed under OER. The rate of etching is  $\sim 0.2 \text{ nm s}^{-1}$ .**  
4

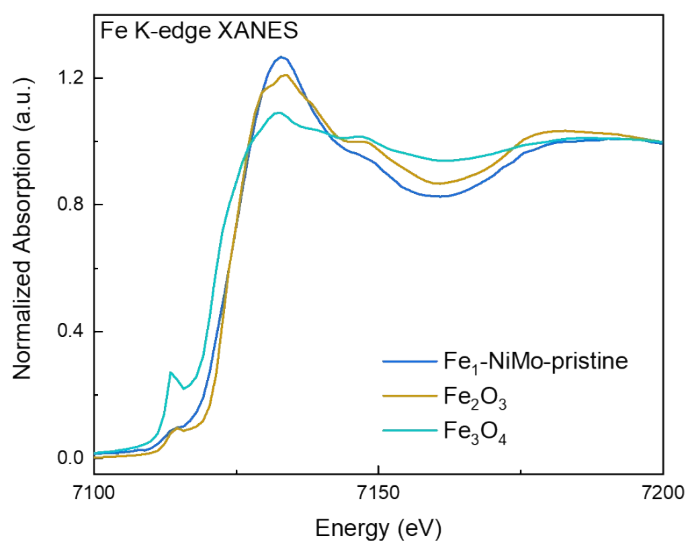

5  
6 **Figure S12. XANES spectra at Fe K-edge of pristine  $\text{Fe}_1\text{-NiMo}$ ,  $\text{Fe}_2\text{O}_3$  reference and**  
7

1 **Fe<sub>3</sub>O<sub>4</sub> reference.** The absorption edge position of Fe<sub>1</sub>-NiMo is closed to Fe<sub>2</sub>O<sub>3</sub>, indicating  
 2 the valance state of Fe in Fe<sub>1</sub>-NiMo is closed to Fe<sup>3+</sup>.

3

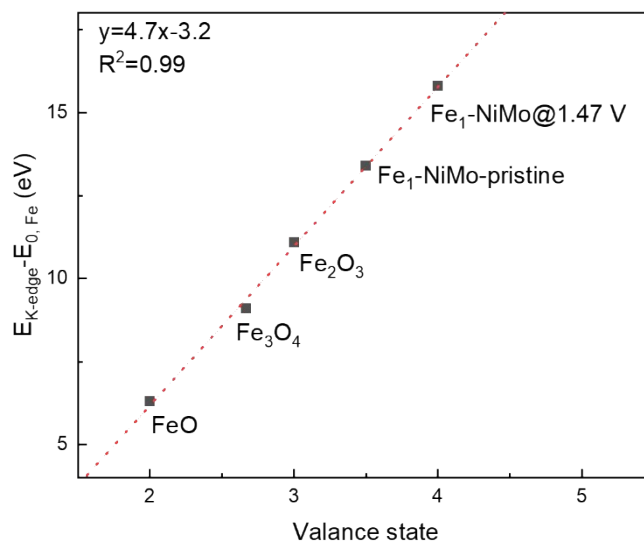

4

5 **Figure S13. Linear exportation of Fe K-edge position of Fe<sub>1</sub>-NiMo and reference**

6 **compounds.** This result indicates that Fe in Fe<sub>1</sub>-NiMo is oxidized to a Fe<sup>4+</sup>.

7

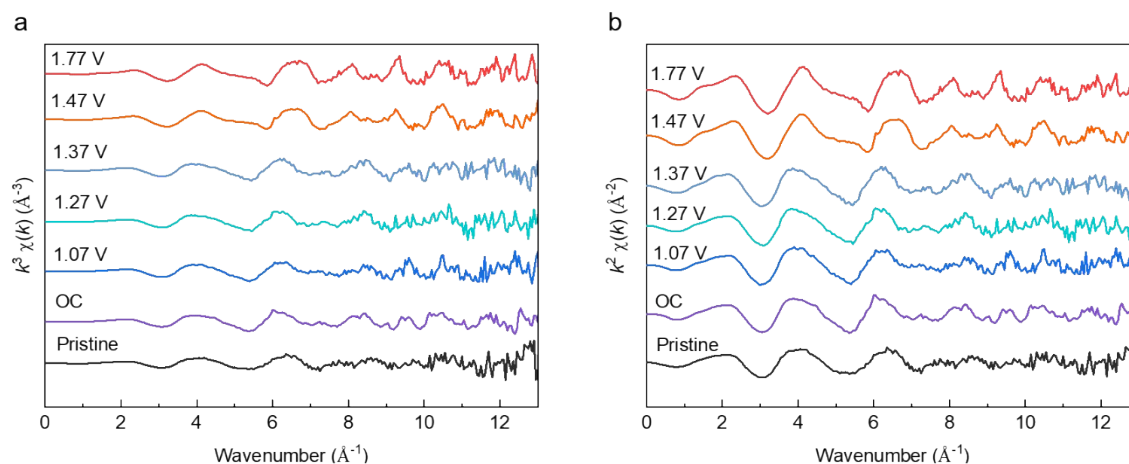

8

9 **Figure S14. The in-situ k<sup>3</sup>-weighted (a), and k<sup>2</sup>-weighted (b), EXAFS spectra at Fe K-**  
 10 **edge of Fe<sub>1</sub>-NiMo.**

11

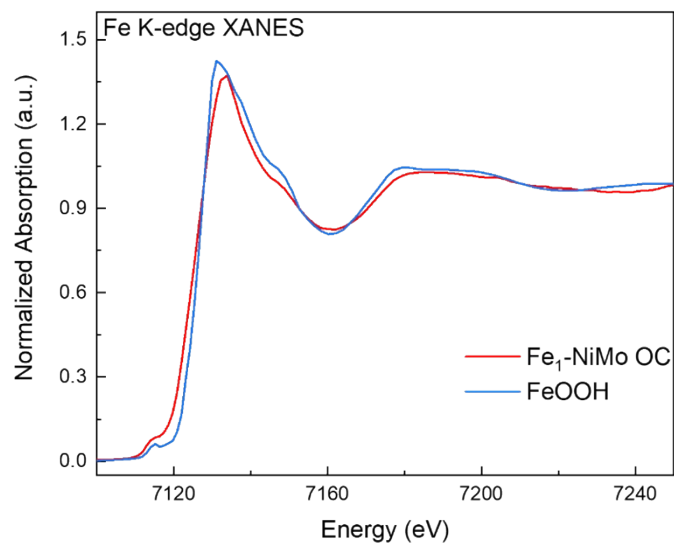

1

2 **Figure S15. Comparison of XANES at Fe K-edge of Fe<sub>1</sub>-NiMo under OC conditions**

3 **and FeOOH.** The XANES of Fe<sub>1</sub>-NiMo shows a higher pre-edge peak and a lower

4 intensity of the white line peak compared to that of FeOOH.

5

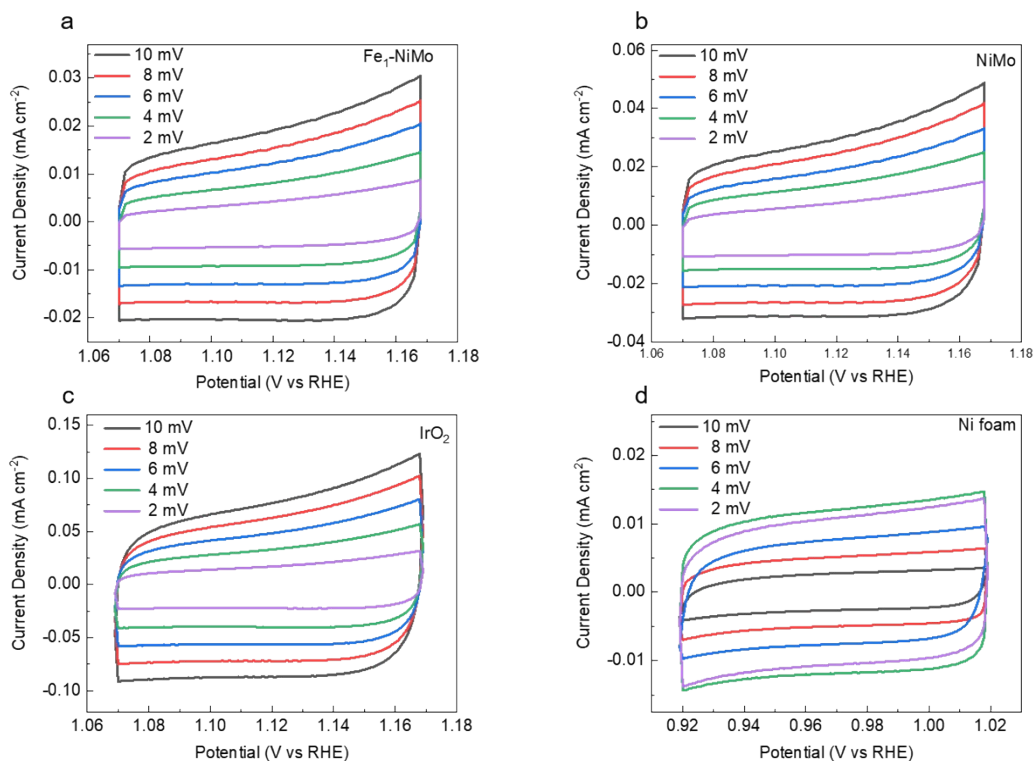

1  
2 **Figure S16. CV curves of (a)Fe<sub>1</sub>-NiMo, (b) NiMo, (c) IrO<sub>2</sub>, and (d) Ni foam in 1.0 M**  
3 **KOH electrolyte.**

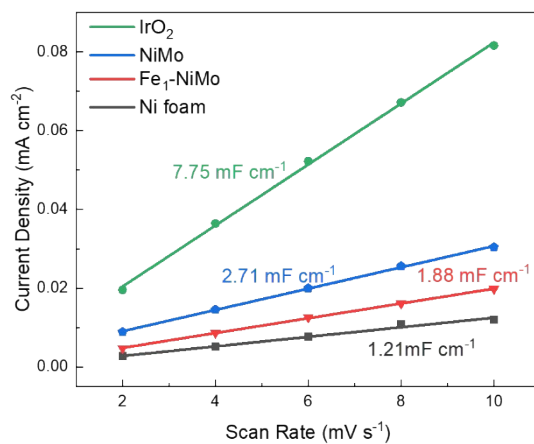

5  
6 **Figure S17. Electrochemical double layer capacities of Fe<sub>1</sub>-NiMo, NiMo, IrO<sub>2</sub>, and Ni**  
7 **foam.**

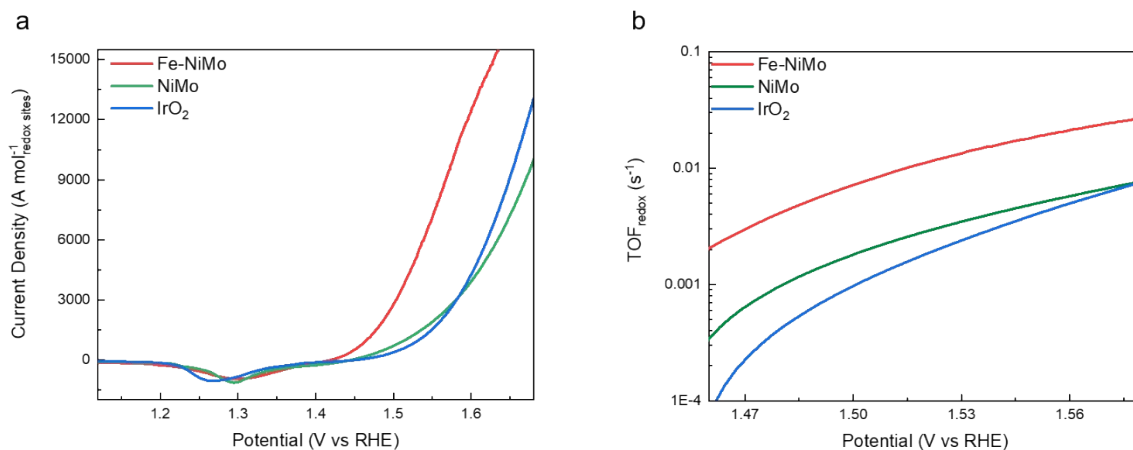

1  
2 **Figure S18. Polarization curves (a), and TOFs (b) normalized by the areas of the**  
3 **redox peaks.** This calculation is based on the assumption that the reducing reaction is a  
4 single electron reaction and all the metal atoms that participated in the reducing reaction  
5 are the active sites.

6

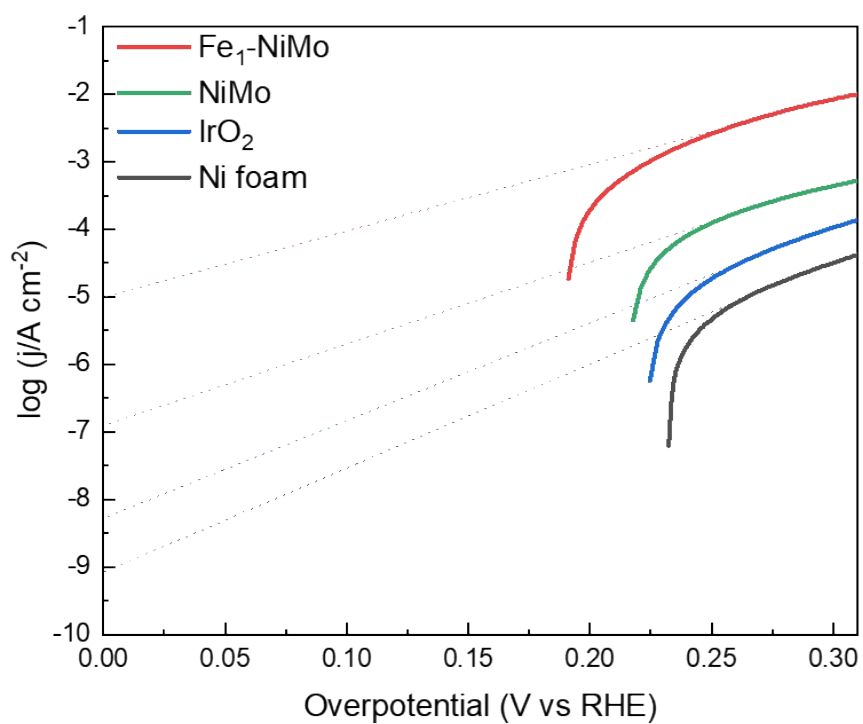

7

8 **Figure S19. Exchange current densities of Fe<sub>1</sub>-NiMo, NiMo,  $\text{IrO}_2$ , and Ni foam.** These

1 results indicate Fe<sub>1</sub>-NiMo process highest activity.

2

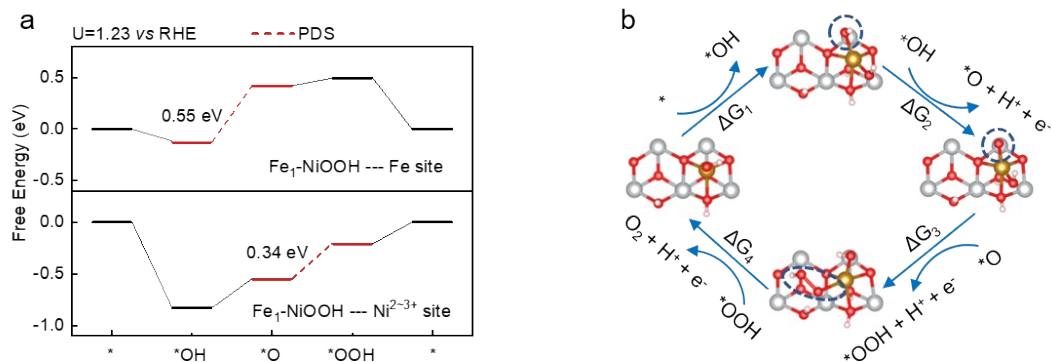

3

4 **Figure S20. OER activity of Fe site in Fe<sub>1</sub>-NiMo. a,** Free energy diagram of OER on the

5 Fe site. **b,** OER cycles for Fe site. (Orange, Fe; grey, Ni; red, O; white, H)

6

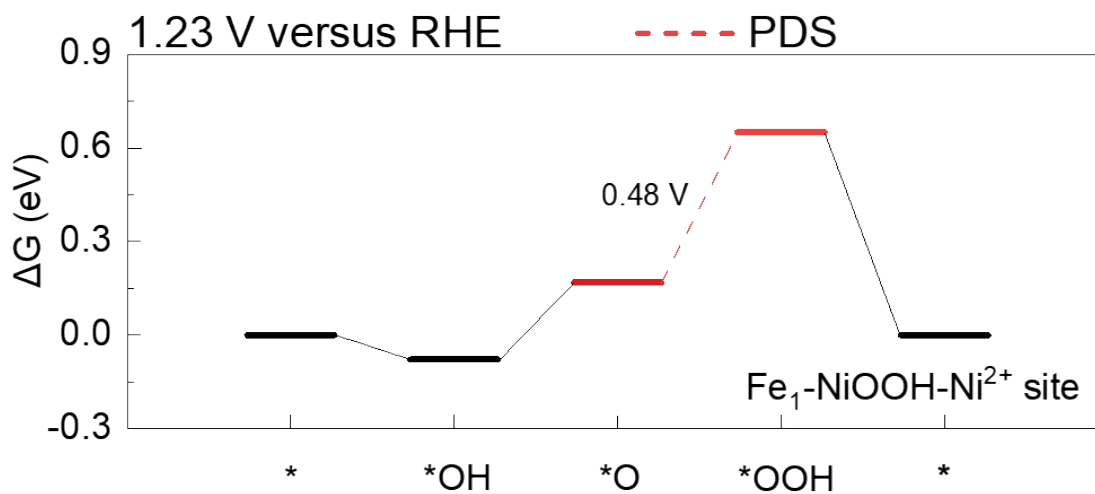

7

8 **Figure S21. Calculated free energy diagram of OER on the Ni<sup>2+</sup> site.**

9

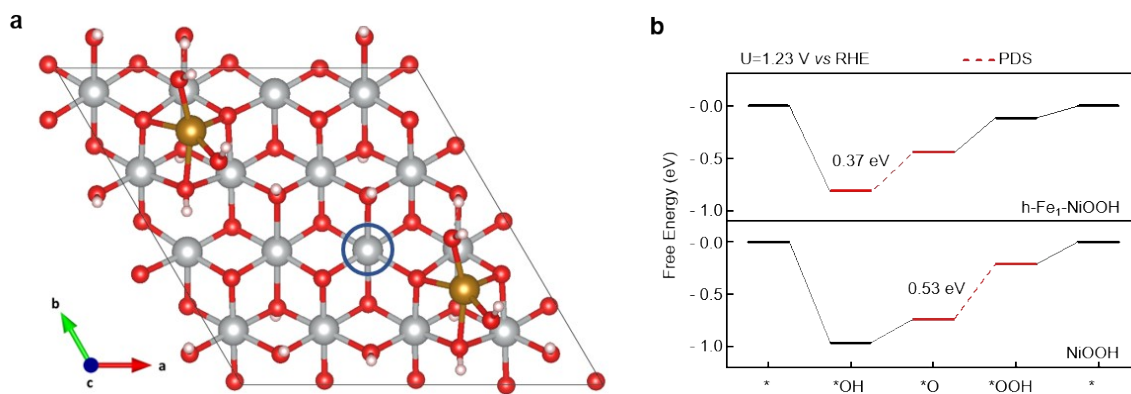

1  
2 **Figure S22. OER activity of h-Fe<sub>1</sub>-NiOOH with a Ni/Fe ratio of 8:1.** (a) Atomic model  
3 of Fe<sub>1</sub>-NiOOH with two mononuclear Fe. The Ni<sup>(2~3)+</sup> with a magnetic moments of 1.7  $\mu_B$   
4 is labeled by a blue cycle. The magnetic moments of Fe is 4.2  $\mu_B$ , corresponding to Fe<sup>4+</sup>. (b)  
5 Free energy diagram of OER on the Ni<sup>(2~3)+</sup> site.  
6

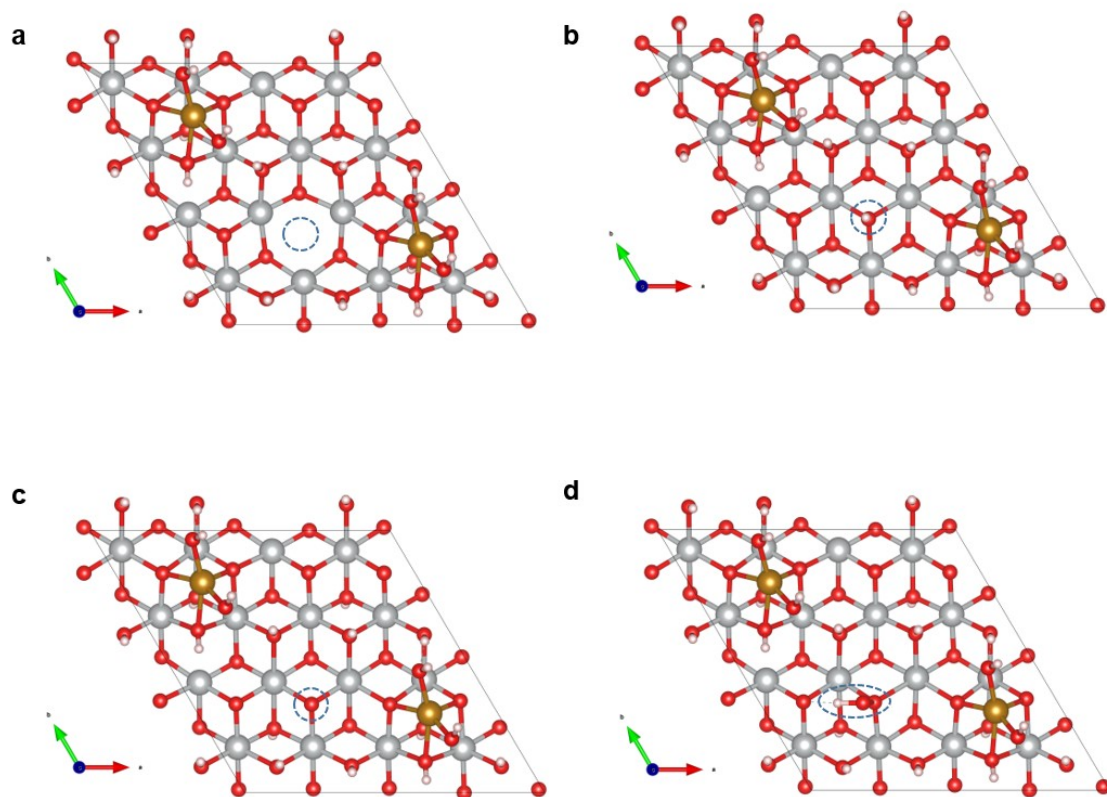

7  
8 **Figure S23. Structure of h-Fe<sub>1</sub>-NiOOH at \* (a), \*OH (b), \*O (c), \*OOH (d) step.**  
9

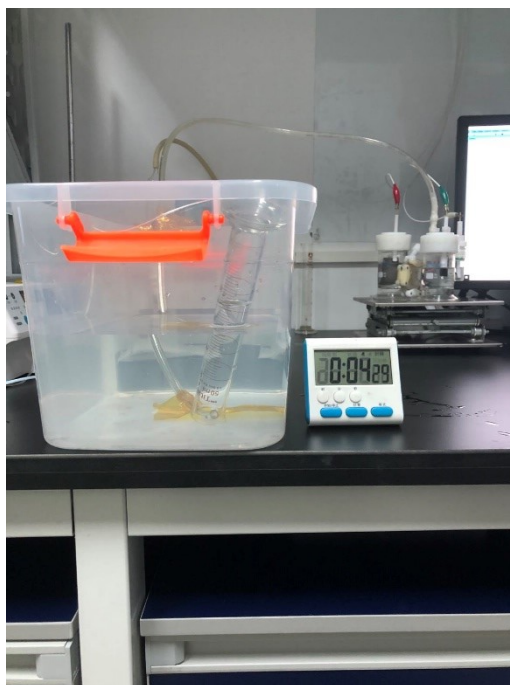

1

2 **Figure S24. A home-made setup for the test of Faraday efficiency.**

3

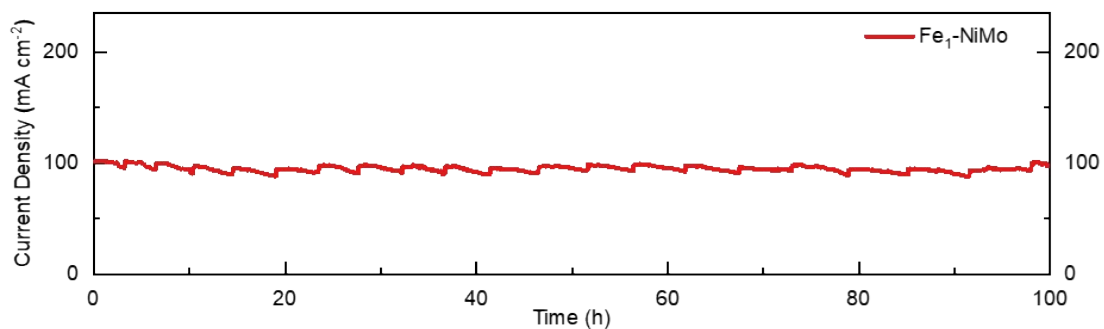

4

5 **Figure S25. Stability test of Fe<sub>1</sub>-NiMo.** This result demonstrates the high stability of Fe<sub>1</sub>-  
 6 NiMo for oxygen evolution. This data is obtained at 1.569 V vs RHE without iR correction.  
 7 And the resistance of solution is 1.065 Ω.

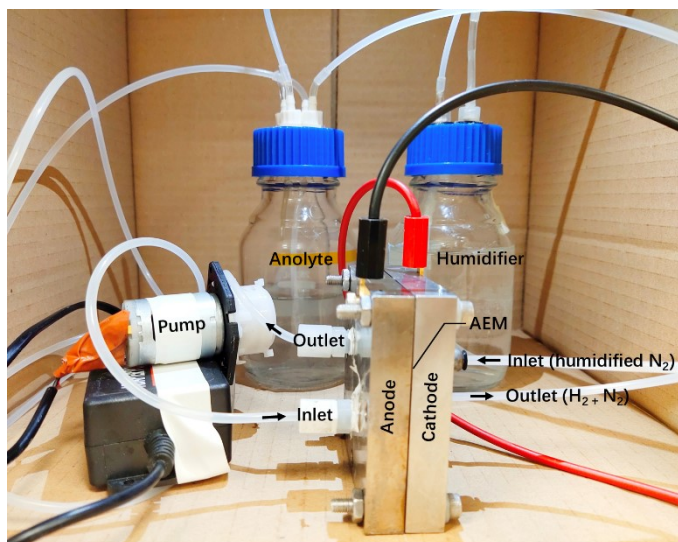

**Figure S26. Setup for measuring the performance of Fe<sub>1</sub>-NiMo in membrane electrode assembly.**

**Table S1. Semi-quantitative results of XPS depth-profile of as pristine Fe<sub>1</sub>-NiMo.**

|                     | Element                  | Fe        | Ni         | Mo         |
|---------------------|--------------------------|-----------|------------|------------|
| Concentration (at%) | Before etching           | 1.79±0.19 | 25.01±2.86 | 73.19±2.90 |
|                     | 10s etching <sup>a</sup> | 0.10±0.14 | 28.53±4.65 | 71.37±4.52 |

<sup>a</sup>The rate of etching in this work is ~0.2 nm s<sup>-1</sup>

**Table S2. Semi-quantitative results of XPS depth-profile of reconstructed Fe<sub>1</sub>-NiMo.**

|                     | Element        | Fe         | Ni         | Mo         |
|---------------------|----------------|------------|------------|------------|
| Concentration (at%) | Before etching | 11.36±2.51 | 88.52±2.36 | 0.12±0.16  |
|                     | 10s etching    | 1.48±1.44  | 80.34±1.89 | 18.27±1.18 |
|                     | 20s etching    | 0.31±0.44  | 94.12±1.10 | 5.57±0.67  |

**Table S3. Structural parameters of Fe<sub>1</sub>-NiMo as well as reference samples extracted from the Fe K-edge EXAFS fitting. ( $S_0^2=0.76$ )**

| Name                               | Atomic<br>scatter | Coordination<br>Number | Interatomic<br>distance<br>(Å) | $\Delta E_0$<br>(eV) | Debye-<br>Waller<br>factor<br>(10 <sup>-3</sup> × Å <sup>2</sup> ) | R<br>factor |
|------------------------------------|-------------------|------------------------|--------------------------------|----------------------|--------------------------------------------------------------------|-------------|
| <b>Fe<sub>2</sub>O<sub>3</sub></b> | Fe-O              | 6.00                   | 2.03±0.13                      | -2.731               | 12.4                                                               | 0.0056      |
| <b>Fe<sub>1</sub>-</b>             |                   |                        |                                |                      |                                                                    |             |
| <b>NiMo-</b>                       | Fe-O              | 4.74±0.95              | 2.02±0.13                      | 0.117                | 11.8                                                               | 0.0070      |
| <b>Pristine</b>                    |                   |                        |                                |                      |                                                                    |             |
| <b>Fe<sub>1</sub>-</b>             | Fe-O              | 4.87±0.97              | 2.01±0.03                      | -0.895               | 6.75                                                               | 0.013       |
| <b>NiMo-</b>                       | Fe-Ni             | 2.92±0.58              | 3.09±0.07                      | -4.531               | 14.08                                                              |             |
| <b>OC</b>                          |                   |                        |                                |                      |                                                                    |             |
| <b>Fe<sub>1</sub>-</b>             | Fe-O              | 5.32±1.06              | 1.94±0.09                      | -2.129               | 8.03                                                               | 0.0032      |
| <b>NiMo-</b>                       | Fe-Ni             | 3.19±0.64              | 2.86±0.04                      | -9.97                | 9.18                                                               |             |
| <b>1.47 V</b>                      |                   |                        |                                |                      |                                                                    |             |

1 The  $k^3$ -weighted EXAFS of Fe K-edge was Fourier transformed to R space using a Hanning  
2 window ( $dk = 1.0 \text{ Å}^{-1}$ ) in k-space between 2.670 and 12.085  $\text{Å}^{-1}$ . The amplitude-reduction  
3 factor  $S_0^2$  was determined by fitting the experimental  $\text{Fe}_2\text{O}_3$  powder data.

4

5

6 **Table S4. A comparison of the OER activity in 1M KOH that normalized by ECSA**

| Catalysts | Overpotential at 1 mA cm <sup>-2</sup> <sub>ECSA</sub> (mV) | reference |
|-----------|-------------------------------------------------------------|-----------|
|-----------|-------------------------------------------------------------|-----------|

|                                           |            |                  |
|-------------------------------------------|------------|------------------|
| <b>Fe<sub>1</sub>-NiMo</b>                | <b>225</b> | <b>This work</b> |
| Ni <sub>83</sub> Fe <sub>17</sub> -ONCAs  | 215        | 17               |
| Ni <sub>0.8</sub> Fe <sub>0.2</sub> -AHNA | 234        | 18               |
| Fe-doped Ni(OH) <sub>2</sub>              | 259        | 19               |
| Se-FeOOH                                  | 324        | 20               |
| EA-FCCA                                   | 257        | 21               |
| NR-Ni(OH) <sub>2</sub>                    | 232        | 22               |
| Fe-Co <sub>3</sub> O <sub>4</sub>         | >300       | 23               |
| Co <sub>0.85</sub> Se-20                  | 248        | 24               |
| CuO nanoparticles                         | 340        | 25               |

1

2 **Table S5.** Magnetic Moment of Ni in Fe<sub>1</sub>-NiOOH and NiOOH at different stage of OER  
3 process.

| Catalyst                 | Magnetic Moment in corresponding stage (μ <sub>B</sub> ) |     |     |      |
|--------------------------|----------------------------------------------------------|-----|-----|------|
|                          | *                                                        | *OH | *O  | *OOH |
| Fe <sub>1</sub> -NiOOH   | 1.7                                                      | 1.7 | 1.4 | 1.7  |
| NiOOH                    | 1.7                                                      | 1.7 | 1.1 | 1.7  |
| h-Fe <sub>1</sub> -NiOOH | 1.7                                                      | 1.7 | 1.4 | 1.7  |

4

5 **Table S6.** A comparison of the OER performance in 1M KOH that normalized by  
6 geometry area.

| Material                                                     | Current density (mA cm <sup>-2</sup> ) | Overpotential (mV) | Reference        |
|--------------------------------------------------------------|----------------------------------------|--------------------|------------------|
| <b>Fe<sub>1</sub>-NiMo</b>                                   | <b>10</b>                              | <b>202</b>         | <b>This work</b> |
|                                                              | <b>50</b>                              | <b>227</b>         |                  |
|                                                              | <b>100</b>                             | <b>245</b>         |                  |
|                                                              | <b>500</b>                             | <b>315</b>         |                  |
|                                                              | <b>1000</b>                            | <b>378</b>         |                  |
| Fe-doped $\beta$ -Ni(OH) <sub>2</sub>                        | 10                                     | 219                | 19               |
| (Ni <sub>x</sub> Fe <sub>1-x</sub> ) <sub>2</sub> P          | 20                                     | 219                | 26               |
| 2D amorphous FePO <sub>4</sub>                               | 10                                     | 218                | 27               |
|                                                              | 300                                    | 270                |                  |
| (NiFe) <sub>2</sub> P(O) nano cube arrays                    | 10                                     | 150                | 28               |
|                                                              | 800                                    | 530                |                  |
| Co-Ni-Se/C/NF                                                | 30                                     | 270                | 29               |
|                                                              | 50                                     | 300                |                  |
| NiCoP-NWAs nanocone arrays                                   | 20                                     | 270                | 30               |
|                                                              | 100                                    | 370                |                  |
| 2D NiCoFe phosphate NSs/N                                    | 10                                     | 240                | 31               |
| Ni <sub>0.65</sub> Ga <sub>0.30</sub> Fe <sub>0.05</sub> /NF | 10                                     | 200                | 32               |
| NiFe/NiCo <sub>2</sub> O <sub>4</sub>                        | 1200                                   | 340                | 33               |
| Ni <sub>0.8</sub> Fe <sub>0.2</sub> -AHNA                    | 10                                     | 193                | 18               |

|                                                      |      |     |    |
|------------------------------------------------------|------|-----|----|
|                                                      | 50   | 221 |    |
|                                                      | 100  | 230 |    |
|                                                      | 500  | 248 |    |
|                                                      | 1000 | 258 |    |
| Se-(NiCo)S/OH                                        | 10   | 155 | 34 |
|                                                      | 120  | 240 |    |
| Ni-Fe-OH@Ni <sub>3</sub> S <sub>2</sub> /NF          | 10   | 165 | 35 |
|                                                      | 100  | 240 |    |
|                                                      | 500  | 370 |    |
|                                                      | 1000 | 469 |    |
|                                                      | 1500 | 565 |    |
| Ni <sub>3</sub> FeN-NPs                              | 10   | 280 | 36 |
|                                                      | 900  | 970 |    |
| FeCoNi-HNTAs                                         | 10   | 184 | 37 |
| Co-doped FeNi carbonate hydroxide                    | 10   | 204 |    |
|                                                      | 50   | 216 | 38 |
|                                                      | 100  | 225 |    |
|                                                      | 500  | 254 |    |
| Nanostructured NiFe (oxy)hydroxide                   | 500  | 261 | 39 |
| FeNiMo oxyhydroxide                                  | 10   | 180 | 40 |
| Fe(PO <sub>3</sub> ) <sub>2</sub> /Ni <sub>2</sub> P | 500  | 265 | 41 |
| Se doped FeOOH                                       | 500  | 348 | 20 |

|                                                                  |      |      |    |
|------------------------------------------------------------------|------|------|----|
| Ni <sub>x</sub> Fe <sub>1-x</sub> Se <sub>2</sub> -derived oxide | 10   | 195  | 42 |
|                                                                  | 265  | 250  |    |
| NiMoN@NiFeN                                                      | 100  | 277  | 43 |
|                                                                  | 500  | 377  |    |
| NiMoO <sub>x</sub> /NiMoS                                        | 10   | 186  | 44 |
|                                                                  | 100  | 225  |    |
|                                                                  | 500  | 278  |    |
|                                                                  | 1000 | 334  |    |
| NiFe coordination polymer                                        | 10   | 188  | 45 |
|                                                                  | 50   | 214  |    |
|                                                                  | 100  | 234  |    |
|                                                                  | 150  | 249  |    |
|                                                                  | 200  | 260  |    |
| FeP/Ni <sub>2</sub> P                                            | 10   | 154  | 45 |
|                                                                  | 690  | 281  |    |
|                                                                  | 1000 | 293  |    |
|                                                                  | 277  | 1277 |    |
| NiVIr-LDH                                                        | 10   | 180  | 46 |
|                                                                  | 100  | 272  |    |
| NiFe-nanomeshes in graphene-like film                            | 100  | 208  | 47 |
|                                                                  | 500  | 253  |    |
|                                                                  | 1000 | 270  |    |
| 3D-LDH @ Ni foam                                                 | 50   | 239  | 48 |

|  |      |     |  |
|--|------|-----|--|
|  | 100  | 252 |  |
|  | 500  | 300 |  |
|  | 1000 | 340 |  |

1

2 **Table S7. Elemental analysis of the electrolyte tested with Fe<sub>1</sub>-NiMo after the**  
3 **reaction.**

| Element              | Fe              | Ni | Mo            |
|----------------------|-----------------|----|---------------|
| Concentration (mg/L) | ND <sup>a</sup> | ND | 466.513±8.167 |

4 <sup>a</sup>ND Stands for below the detection limit of our facility (0.002 mg/L of Fe, 0.008  
5 mg/L of Ni, and 0.004 mg/L of Mo).

6

7 **Table S8. Elemental analysis of Fe<sub>1</sub>-NiMo and NiMo after the reaction**

|               | element               | Fe                | Ni    | Mo   |
|---------------|-----------------------|-------------------|-------|------|
| Concentration | Fe <sub>1</sub> -NiMo | 1.49              | 60.06 | 4.99 |
| (wt%)         | NiMo                  | 0.02 <sup>a</sup> | 71.76 | 5.13 |

8 <sup>a</sup>The trace amount of Fe is came from the pollution in the experiment.

9

## 1 Supplementary Reference

- 2 1. Newville BRM. ATHENA, ARTEMIS, HEPHAESTUS: data analysis for X-ray  
3 absorption spectroscopy using IFEFFIT *Journal of Synchrotron Radiation* 2005,  
4 **12**: 537-541.
- 5 2. Rehr JJ, Albers RC. Theoretical approaches to x-ray absorption fine structure.  
6 *Reviews of Modern Physics* 2000, **72**(3): 621-654.
- 7 3. Funke H, Scheinost AC, Chukalina M. Wavelet analysis of extended x-ray  
8 absorption fine structure data. *Phys. Rev. B* 2005, **71**(9).
- 9 4. McCrory CCL, Jung S, Ferrer IM, Chatman SM, Peters JC, Jaramillo TF.  
10 Benchmarking Hydrogen Evolving Reaction and Oxygen Evolving Reaction  
11 Electrocatalysts for Solar Water Splitting Devices. *J. Am. Chem. Soc.* 2015,  
12 **137**(13): 4347-4357.
- 13 5. McCrory CCL, Jung S, Peters JC, Jaramillo TF. Benchmarking Heterogeneous  
14 Electrocatalysts for the Oxygen Evolution Reaction. *J. Am. Chem. Soc.* 2013,  
15 **135**(45): 16977-16987.
- 16 6. Kresse G, Hafner J. Ab initio molecular dynamics for liquid metals. *Physical review*  
17 *B* 1993, **47**(1): 558.
- 18 7. Kresse G, Hafner J. Ab initio molecular-dynamics simulation of the liquid-metal–  
19 amorphous-semiconductor transition in germanium. *Physical Review B* 1994,  
20 **49**(20): 14251.
- 21 8. Kresse G, Furthmüller J. Efficient iterative schemes for ab initio total-energy  
22 calculations using a plane-wave basis set. *Physical review B* 1996, **54**(16): 11169.
- 23 9. Perdew JP, Burke K, Ernzerhof M. Generalized Gradient Approximation Made  
24 Simple. *Phys Rev Lett* 1996, **77**(18): 3865-3868.
- 25 10. Blöchl PE. Projector augmented-wave method. *Physical review B* 1994, **50**(24):  
26 17953.

27

- 1 11. Grimme S, Antony J, Ehrlich S, Krieg H. A consistent and accurate ab initio  
2 parametrization of density functional dispersion correction (DFT-D) for the 94  
3 elements H-Pu. *The Journal of chemical physics* 2010, **132**(15): 154104.
- 4 12. Grimme S, Ehrlich S, Goerigk L. Effect of the damping function in dispersion  
5 corrected density functional theory. *J. Comput. Chem.* 2011, **32**(7): 1456-1465.
- 6 13. Dudarev SL, Botton GA, Savrasov SY, Humphreys CJ, Sutton AP. Electron-  
7 energy-loss spectra and the structural stability of nickel oxide: An LSDA+U study.  
8 *Phys. Rev. B* 1998, **57**(3): 1505-1509.
- 9 14. Zhou Y, López N. The Role of Fe Species on NiOOH in Oxygen Evolution  
10 Reactions. *ACS Catal.* 2020, **10**(11): 6254-6261.
- 11 15. Rossmeisl J, Logadottir A, Nørskov JK. Electrolysis of water on (oxidized) metal  
12 surfaces. *Chemical Physics* 2005, **319**(1-3): 178-184.
- 13 16. Rossmeisl J, Qu ZW, Zhu H, Kroes GJ, Nørskov JK. Electrolysis of water on oxide  
14 surfaces. *J Electroanal Chem* 2007, **607**(1-2): 83-89.
- 15 17. Liu P, Chen B, Liang C, Yao W, Cui Y, Hu S, *et al.* Tip-Enhanced Electric Field: A  
16 New Mechanism Promoting Mass Transfer in Oxygen Evolution Reactions. *Adv.*  
17 *Mater.* 2021, **33**(9): 2007377.
- 18 18. Liang C, Zou P, Nairan A, Zhang Y, Liu J, Liu K, *et al.* Exceptional performance of  
19 hierarchical Ni-Fe oxyhydroxide@NiFe alloy nanowire array electrocatalysts for  
20 large current density water splitting. *Energy Environ. Sci.* 2020, **13**(1): 86-95.
- 21 19. Kou T, Wang S, Hauser JL, Chen M, Oliver SRJ, Ye Y, *et al.* Ni Foam-Supported  
22 Fe-Doped  $\beta$ -Ni(OH)<sub>2</sub> Nanosheets Show Ultralow Overpotential for Oxygen  
23 Evolution Reaction. *ACS Energy Lett.* 2019, **4**(3): 622-628.
- 24 20. Niu S, Jiang W-J, Wei Z, Tang T, Ma J, Hu J-S, *et al.* Se-Doping Activates FeOOH  
25 for Cost-Effective and Efficient Electrochemical Water Oxidation. *J. Am. Chem.*  
26 *Soc.* 2019, **141**(17): 7005-7013.
- 27 21. Zhang N, Feng X, Rao D, Deng X, Cai L, Qiu B, *et al.* Lattice oxygen activation

- 1 enabled by high-valence metal sites for enhanced water oxidation. *Nat. Commun.*  
2 2020, **11**(1): 4066.
- 3 22. Wang XP, Wu HJ, Xi SB, Lee WSV, Zhang J, Wu ZH, *et al.* Strain stabilized nickel  
4 hydroxide nanoribbons for efficient water splitting. *Energy Environ. Sci.* 2020,  
5 **13**(1): 229-237.
- 6 23. Zhang SL, Guan BY, Lu XF, Xi S, Du Y, Lou XW. Metal Atom-Doped Co<sub>3</sub>O<sub>4</sub>  
7 Hierarchical Nanoplates for Electrocatalytic Oxygen Evolution. *Adv. Mater.* 2020,  
8 **32**(31): 2002235.
- 9 24. Zhang J, Xu Q, Hu Y, Jiang H, Li C. Selenium vacancy triggered atomic  
10 disordering of Co<sub>0.85</sub>Se nanoparticles towards a highly-active electrocatalyst for  
11 water oxidation. *Chem. Commun.* 2020, **56**(92): 14451-14454.
- 12 25. Huan TN, Rousse G, Zanna S, Lucas IT, Xu X, Menguy N, *et al.* A Dendritic  
13 Nanostructured Copper Oxide Electrocatalyst for the Oxygen Evolution Reaction.  
14 *Angew. Chem. Int. Ed.* 2017, **56**(17): 4792-4796.
- 15 26. Yu J, Cheng G, Luo W. Hierarchical NiFeP microflowers directly grown on Ni  
16 foam for efficient electrocatalytic oxygen evolution. *J. Mater. Chem. A* 2017,  
17 **5**(22): 11229-11235.
- 18 27. Yang L, Guo Z, Huang J, Xi Y, Gao R, Su G, *et al.* Vertical Growth of 2D  
19 Amorphous FePO<sub>4</sub> Nanosheet on Ni Foam: Outer and Inner Structural Design for  
20 Superior Water Splitting. *Adv. Mater.* 2017, **29**(46): 1704574.
- 21 28. Xi W, Yan G, Lang Z, Ma Y, Tan H, Zhu H, *et al.* Oxygen-Doped Nickel Iron  
22 Phosphide Nanocube Arrays Grown on Ni Foam for Oxygen Evolution  
23 Electrocatalysis. *Small* 2018, **14**(42): 1802204.
- 24 29. Ming F, Liang H, Shi H, Xu X, Mei G, Wang Z. MOF-derived Co-doped nickel  
25 selenide/C electrocatalysts supported on Ni foam for overall water splitting. *J.*  
26 *Mater. Chem. A* 2016, **4**(39): 15148-15155.

27

- 1 30. Li J, Wei G, Zhu Y, Xi Y, Pan X, Ji Y, *et al.* Hierarchical NiCoP nanocone arrays  
2 supported on Ni foam as an efficient and stable bifunctional electrocatalyst for  
3 overall water splitting. *J. Mater. Chem. A* 2017, **5**(28): 14828-14837.
- 4 31. Sial MAZG, Lin H, Wang X. Microporous 2D NiCoFe phosphate nanosheets  
5 supported on Ni foam for efficient overall water splitting in alkaline media.  
6 *Nanoscale* 2018, **10**(27): 12975-12980.
- 7 32. Zai SF, Dong AQ, Li J, Wen Z, Yang CC, Jiang Q. Low-crystallinity mesoporous  
8 NiGaFe hydroxide nanosheets on macroporous Ni foam for high-efficiency oxygen  
9 evolution electrocatalysis. *J. Mater. Chem. A* 2021, **9**(10): 6223-6231.
- 10 33. Xiao C, Li Y, Lu X, Zhao C. Bifunctional Porous NiFe/NiCo<sub>2</sub>O<sub>4</sub>/Ni Foam  
11 Electrodes with Triple Hierarchy and Double Synergies for Efficient Whole Cell  
12 Water Splitting. *Adv. Funct. Mater.* 2016, **26**(20): 3515-3523.
- 13 34. Hu C, Zhang L, Zhao Z-J, Li A, Chang X, Gong J. Synergism of Geometric  
14 Construction and Electronic Regulation: 3D Se-(NiCo)S<sub>x</sub>/(OH)<sub>x</sub>Nanosheets for  
15 Highly Efficient Overall Water Splitting. *Adv. Mater.* 2018, **30**(12): 1705538.
- 16 35. Zou X, Liu Y, Li G-D, Wu Y, Liu D-P, Li W, *et al.* Ultrafast Formation of  
17 Amorphous Bimetallic Hydroxide Films on 3D Conductive Sulfide Nanoarrays for  
18 Large-Current-Density Oxygen Evolution Electrocatalysis. *Adv. Mater.* 2017,  
19 **29**(22): 1700404.
- 20 36. Jia X, Zhao Y, Chen G, Shang L, Shi R, Kang X, *et al.* Ni<sub>3</sub>FeN Nanoparticles  
21 Derived from Ultrathin NiFe-Layered Double Hydroxide Nanosheets: An Efficient  
22 Overall Water Splitting Electrocatalyst. *Advanced Energy Materials* 2016, **6**(10):  
23 1502585.
- 24 37. Li H, Chen S, Zhang Y, Zhang Q, Jia X, Zhang Q, *et al.* Systematic design of  
25 superaerophobic nanotube-array electrode comprised of transition-metal sulfides  
26 for overall water splitting. *Nat. Commun.* 2018, **9**(1): 2452.
- 27 38. Qi Y, Wang Q, Wang X, Liu Z, Zhao X, Yang E. Self-supported Co-doped FeNi

- 1 carbonate hydroxide nanosheet array as a highly efficient electrocatalyst towards  
2 the oxygen evolution reaction in an alkaline solution. *Nanoscale* 2019, **11**(22):  
3 10595-10602.
- 4 39. Zhong D, Zhang L, Li C, Li D, Wei C, Zhao Q, *et al.* Nanostructured NiFe  
5 (oxy)hydroxide with easily oxidized Ni towards efficient oxygen evolution  
6 reactions. *J. Mater. Chem. A* 2018, **6**(35): 16810-16817.
- 7 40. Zhang B, Wang L, Cao Z, Kozlov SM, García De Arquer FP, Dinh CT, *et al.* High-  
8 valence metals improve oxygen evolution reaction performance by modulating 3d  
9 metal oxidation cycle energetics. *Nat. Catal.* 2020, **3**(12): 985-992.
- 10 41. Zhou H, Yu F, Sun J, He R, Chen S, Chu C-W, *et al.* Highly active catalyst derived  
11 from a 3D foam of Fe(PO<sub>3</sub>)<sub>2</sub>Ni<sub>2</sub>P for extremely efficient water oxidation. *Proc.*  
12 *Natl. Acad. Sci.* 2017, **114**(22): 5607-5611.
- 13 42. Xu X, Song F, Hu X. A nickel iron diselenide-derived efficient oxygen-evolution  
14 catalyst. *Nat. Commun.* 2016, **7**(1): 12324.
- 15 43. Yu L, Zhu Q, Song S, McElhenny B, Wang D, Wu C, *et al.* Non-noble metal-nitride  
16 based electrocatalysts for high-performance alkaline seawater electrolysis. *Nat.*  
17 *Commun.* 2019, **10**(1): 5106.
- 18 44. Zhai P, Zhang Y, Wu Y, Gao J, Zhang B, Cao S, *et al.* Engineering active sites on  
19 hierarchical transition bimetal oxides/sulfides heterostructure array enabling robust  
20 overall water splitting. *Nat. Commun.* 2020, **11**(1): 5462.
- 21 45. Li W, Li F, Yang H, Wu X, Zhang P, Shan Y, *et al.* A bio-inspired coordination  
22 polymer as outstanding water oxidation catalyst via second coordination sphere  
23 engineering. *Nat. Commun.* 2019, **10**(1): 5074.
- 24 46. Wang D, Li Q, Han C, Lu Q, Xing Z, Yang X. Atomic and electronic modulation of  
25 self-supported nickel-vanadium layered double hydroxide to accelerate water  
26 splitting kinetics. *Nat. Commun.* 2019, **10**(1): 3899.
- 27 47. Zhang J, Jiang WJ, Niu S, Zhang H, Liu J, Li H, *et al.* Organic Small Molecule

- 1        Activates Transition Metal Foam for Efficient Oxygen Evolution Reaction. *Adv.*  
2        *Mater.* 2020, **32**(11): 1906015.
- 3 48.    Liu Y, Liang X, Gu L, Zhang Y, Li G-D, Zou X, *et al.* Corrosion engineering  
4        towards efficient oxygen evolution electrodes with stable catalytic activity for over  
5        6000 hours. *Nat. Commun.* 2018, **9**(1): 2609.  
6  
7
